# Supplementary material for: SlTPR1, a tomato tetratricopeptide repeat protein, interacts with the ethylene receptors NR and LeETR1, modulating ethylene and auxin responses and development
Source: PubMed Central journal article supplement — J Exp Bot. 2008 Nov;59(15):4271–87. doi: 10.1093/jxb/ern276 (PMC2639023; doi:10.1093/jxb/ern276), 2008-11
Supplement: ern276_1.pdf [file ern276_1.pdf]

## Supplementary Data

# SITPR1, a tomato tetratricopeptide repeat protein, interacts with the ethylene receptors NR and LeETR1, modulating ethylene and auxin responses and development

### Authors

Zhefeng Lin, Luis Arciga-Reyes<sup>1</sup>, Silin Zhong, Lucy Alexander<sup>2</sup>, Rachel Hackett<sup>3</sup>, Ian Wilson<sup>4</sup>, and Don Grierson\*

Plant and Crop Sciences Division, School of Biosciences, University of Nottingham, Sutton Bonington Campus, Loughborough, LE12 5RD, UK

### Present address:

<sup>1</sup> Bayer de Mexico, Bayer CropScience BioScience, M. Cervantes Saavedra 259, 11520. Mexico D.F.

<sup>2</sup> Waltham Centre for Pet Nutrition, Waltham, Leicestershire, LE14 4RT, UK.

<sup>3</sup> IGD, Grange Lane, Letchmore Heath, Watford, Hertfordshire, WD25 8GD, UK

<sup>4</sup> Faculty of Applied Sciences, University of the West of England, Bristol, Frenchay Campus, Coldharbour Lane, BS16 1QY, UK.

\* Corresponding author: Don Grierson

Tel : 0115951 6333

Fax: 0115951 6334

E-mail: [donald.grierson@nottingham.ac.uk](mailto:donald.grierson@nottingham.ac.uk)

### Running title:

SITPR1, ethylene signalling and development

## Supplementary Material

### **Figure S1.** Interaction assay of SITPR1 with the ethylene receptors.

A. Receptors and SITPR1 constructs used for yeast two-hybrid assays (TMD = transmembrane domain; DB = LexA DNA binding domain; AD = activation domain).

B. Verification of bait protein synthesis in yeast by western blot using anti-LexA antibody. 1. DB-LeETR1; 2. DB-LeETR2; 3. DB-NR; 4. DB-LeETR4; 5. DB-LeETR5; 6. DB-LeETR6; 7. Bait vector pEG202 containing LexA DNA binding domain.

C. Activation assay of *LacZ* reporter by interaction of SITPR1 and the receptors: 1, LeETR1/SITPR1; 2, LeETR2/SITPR1; 3, NR/SITPR1; 4, LeETR4/SITPR1; 5 LeETR5/SITPR1; 6, LeETR6/SITPR1; P, positive control pSH17-4; N, Negative control pRFHM1. Gala: galactose.

**Figure S2.** Adventitious root formation on cuttings from wild type and SITPR1 transgenic plants with and without IBA treatment. Cuttings about 8 cm in length from the side shoots of wild type and the transgenic plants were dipped in talcum powder containing 0 or 1,000  $\mu\text{g/g}$  IBA. Ten cuttings were taken from plants of each line and propagated in 5 cm pots containing perlite and maintained in the glasshouse in high humidity. After three weeks, the total number of root initials for each cutting was examined and photographed. Experiments were repeated twice.

**Figure S3.** Co-localization of the SITPR1-GFP fusion with the red-fluorescent membrane stain FM 4-64. *Arabidopsis* roots (A-C) and hypocotyls (D-F) expressing SITPR1-GFP were treated with the red-fluorescent membrane dye FM 4-64 (Invitrogen) and examined using a Leica TCS SP2 confocal scanning microscope. (A and D) SITPR1-GFP. (B and E) FM 4-64 dye. (C and F) Bright-field image. Scale bar = 75  $\mu\text{m}$  (root) and 31  $\mu\text{m}$  (hypocotyl).

**Table S1.** Adventitious root formation on cuttings from wild type and transgenic line treated with 0 or 1000  $\mu\text{g/g}$  IBA

| Lines     | 0               |               |     | 1000 $\mu\text{g/g}$ |                  |     |
|-----------|-----------------|---------------|-----|----------------------|------------------|-----|
|           | Rooted cuttings | Total root no | %   | Rooted cuttings      | Total root no    | %   |
| Wild type | 10              | 15 $\pm$ 5    | 100 | 10                   | 100.5 $\pm$ 19.5 | 100 |
| 3278A     | 9               | 8 $\pm$ 8     | 53  | 10                   | 47 $\pm$ 30      | 47  |
| 3286A     | 5               | 2.6 $\pm$ 4.4 | 17  | 9                    | 19.5 $\pm$ 19.5  | 19  |
| 3272A     | 5               | 2.2 $\pm$ 5   | 15  | 10                   | 17.3 $\pm$ 15.7  | 17  |
| 3273A     | 5               | 3.7 $\pm$ 7   | 25  | 9                    | 30 $\pm$ 37      | 30  |

Data represent the mean of two independent experiments.

(a)

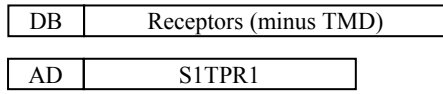

(b)

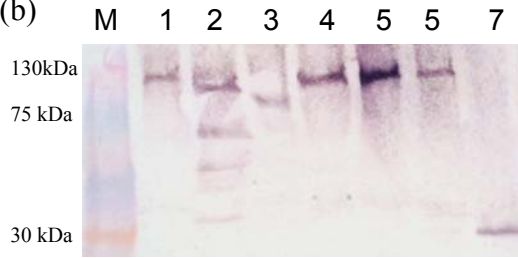

(c)

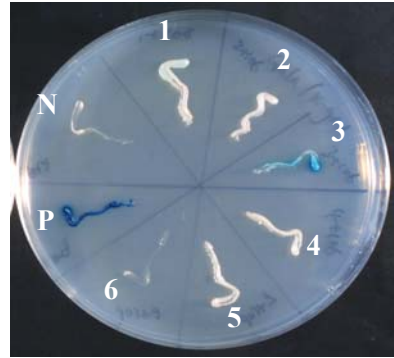

gala/x-gal

Figure S1

0 IBA

1000  $\mu\text{g/g}$  IBA

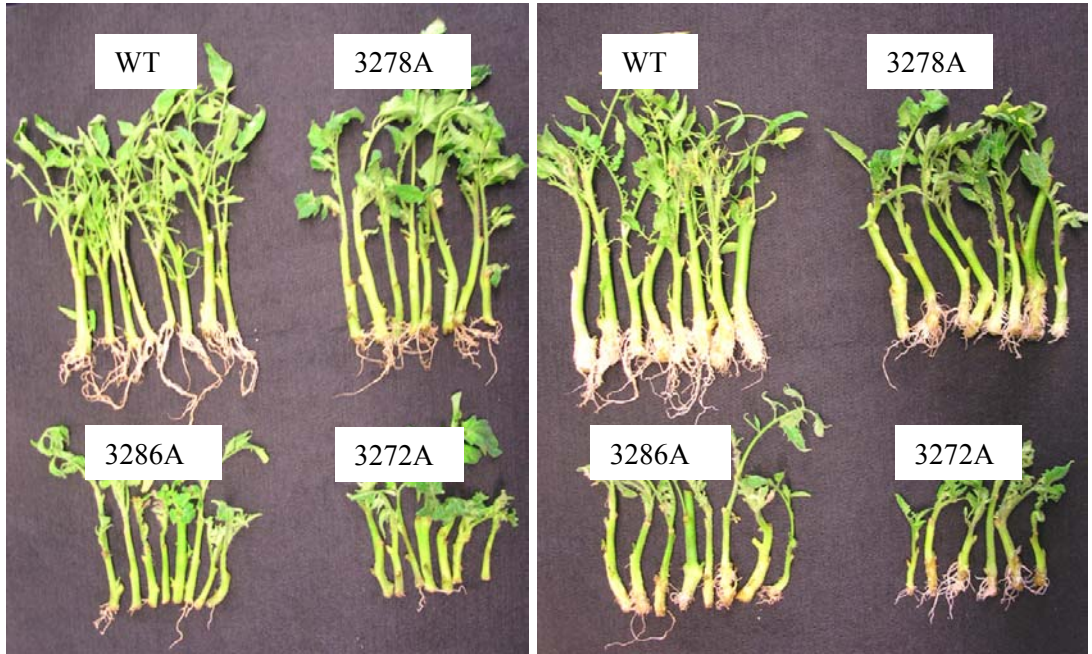

Figure S2

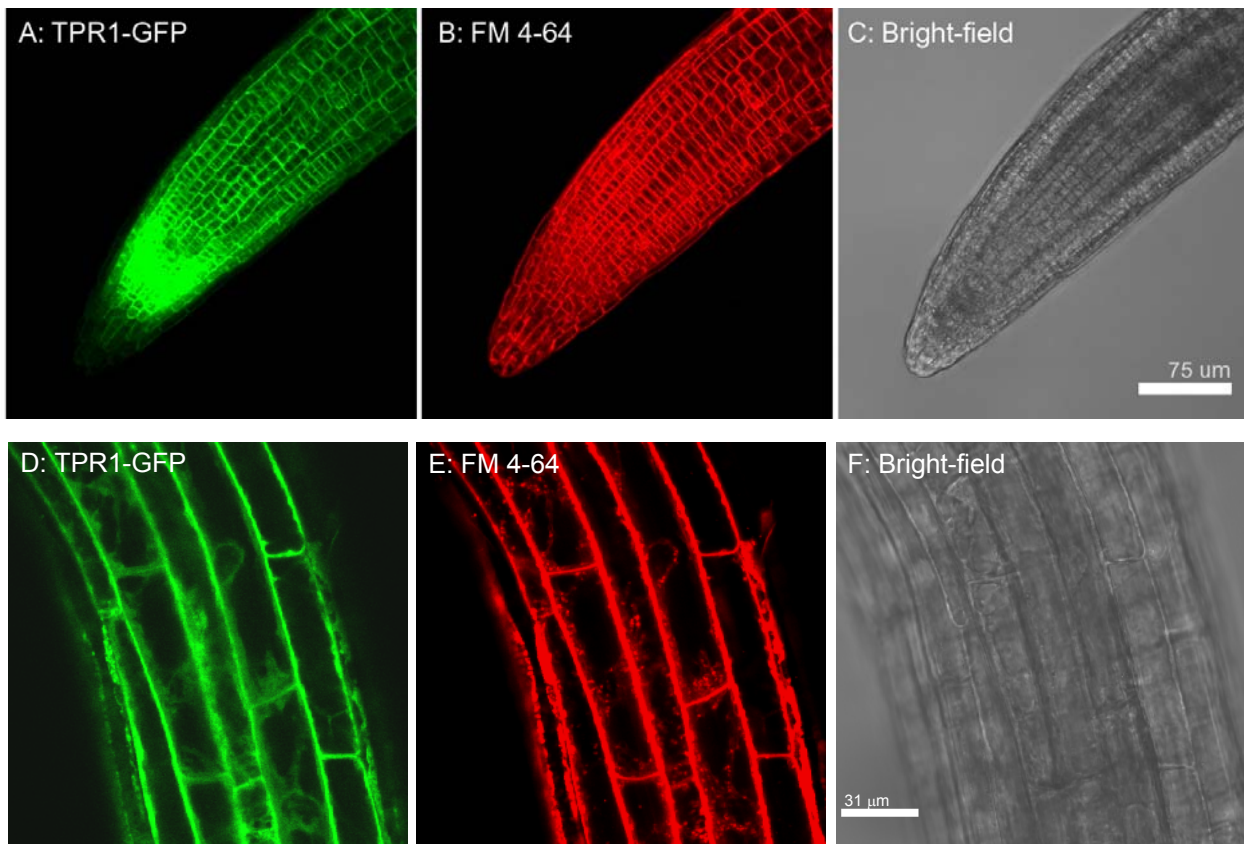

Figure S3
